# Supplementary material for: Assessing thyroid health: phenotypic age compared to chronological age
Source: Frontiers journal article supplement (doi:10.3389/fendo.2025.1594139), 2025-07-04
Supplement: Data_Sheet_1.pdf [file Data_Sheet_1.pdf]

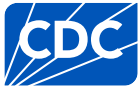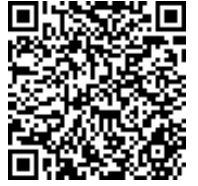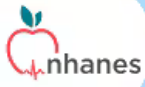

National Health and Nutrition Examination Survey

# NCHS Ethics Review Board (ERB) Approval\*

| Survey Name/Date | NCHS IRB/ERB Protocol Number or Description                                                          |
|------------------|------------------------------------------------------------------------------------------------------|
| NHANES 2021-2022 | Protocol #2021-05                                                                                    |
| NHANES 2019-2020 | Protocol #2018-01                                                                                    |
| NHANES 2017-2018 | Protocol #2018-01 (Effective beginning October 26, 2017)                                             |
|                  | Continuation of Protocol #2011-17 (Effective through October 26, 2017)                               |
| NHANES 2015-2016 | Continuation of Protocol #2011-17                                                                    |
| NHANES 2013-2014 | Continuation of Protocol #2011-17                                                                    |
| NHANES 2011-2012 | Protocol #2011-17                                                                                    |
| NHANES 2009-2010 | Continuation of Protocol #2005-06                                                                    |
| NHANES 2007-2008 | Continuation of Protocol #2005-06                                                                    |
| NHANES 2005-2006 | Protocol #2005-06                                                                                    |
| NHANES 1999-2004 | Protocol #98-12                                                                                      |
| NHANES III       | Institutional Review Board (IRB) approval and documented consent was obtained from participants      |
| NHANES II        | Underwent internal human subjects review, but IRB approval using current standards was not obtained. |
| NHANES I         | Underwent internal human subjects review, but IRB approval using current standards was not obtained. |
| NHES             | Underwent internal human subjects review, but IRB approval using current standards was not obtained. |

\* In 2003, the NHANES Institutional Review Board (IRB) changed its name to the NCHS Research Ethics Review Board (ERB). In 2018, the name was changed from NCHS Research Ethics Review Board to NCHS Ethics Review Board.

Last Reviewed: August 24, 2022

Source: [National Center for Health Statistics](#)

Was this page helpful?

Yes

Partly

No
